# Supplementary material for: Polymorphs of aromatic thiolato 1, 2 or 1,4-naphthoquinones
Source: Royal Society of Chemistry journal article supplement (doi:10.1039/c0ce00591f), 2010-12-06
Supplement: c0ce00591f.pdf [file c0ce00591f.pdf]

## Supplementary materials

### Polymorphs of aromatic thiolato 1, 2 or 1,4-naphthoquinones

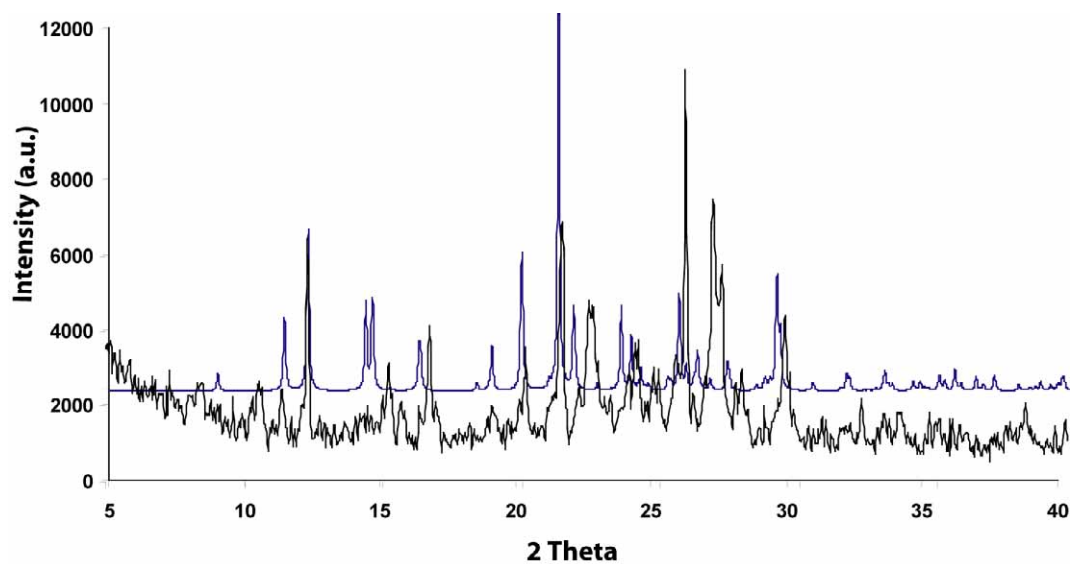

Fig : PXRD patterns of polymorph 1 (black = experimental, blue = simulated).

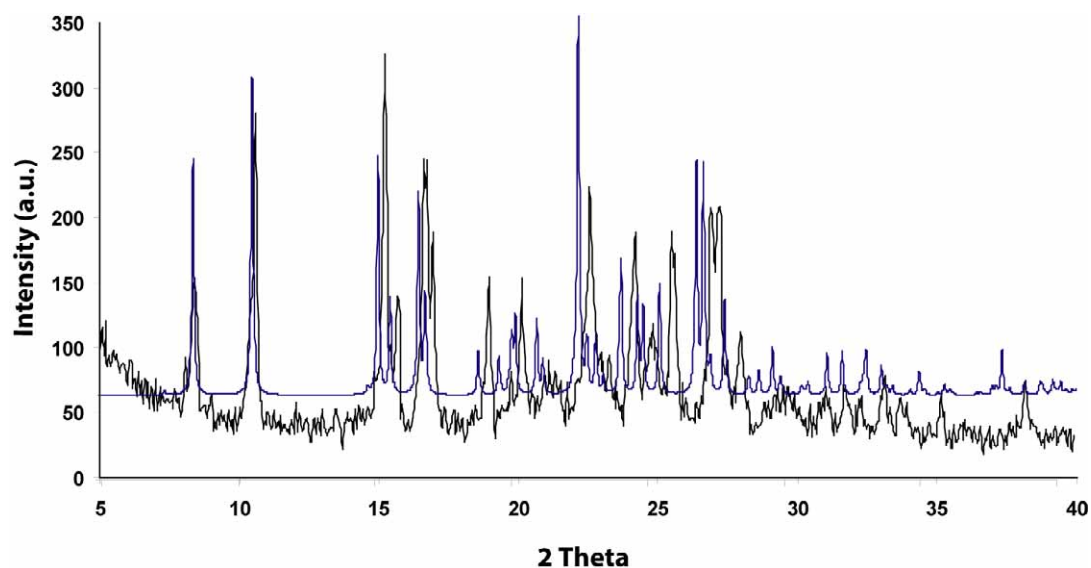

Fig : PXRD patterns of polymorph 2 (black = experimental, blue = simulated).

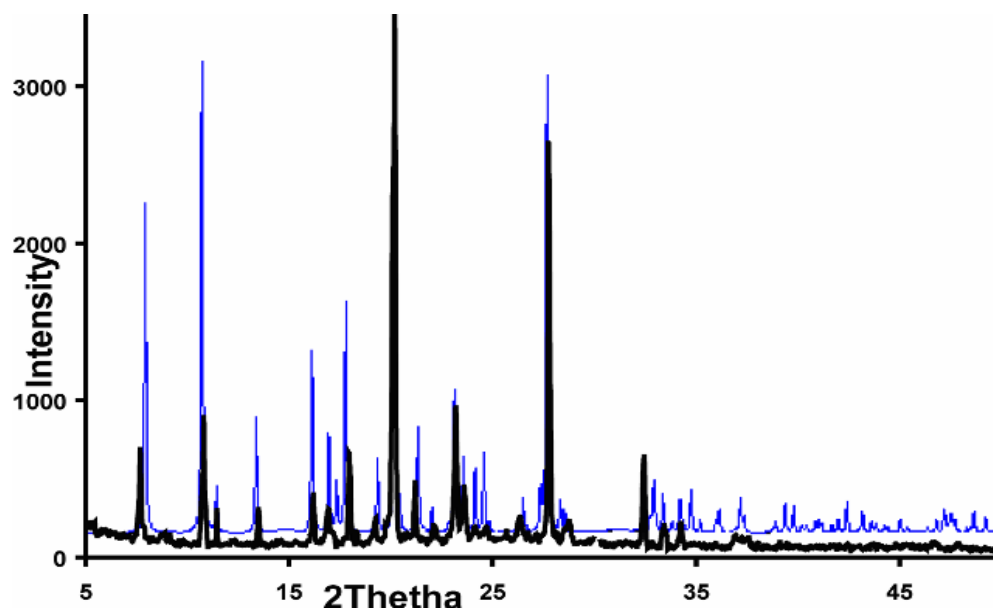

Fig : PXRD patterns of polymorph 3 (black = experimental, blue = simulated).

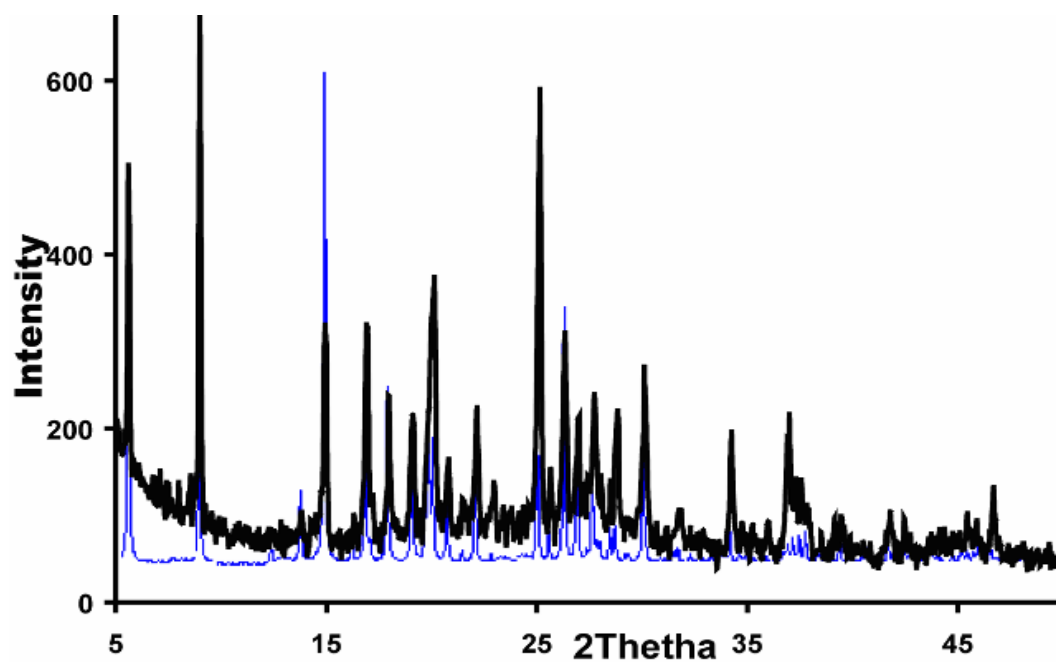

**Fig.** Powder diffraction pattern of polymorphs 4 (black = experimental; blue l = simulated)

## Differential Scanning Calorimetry

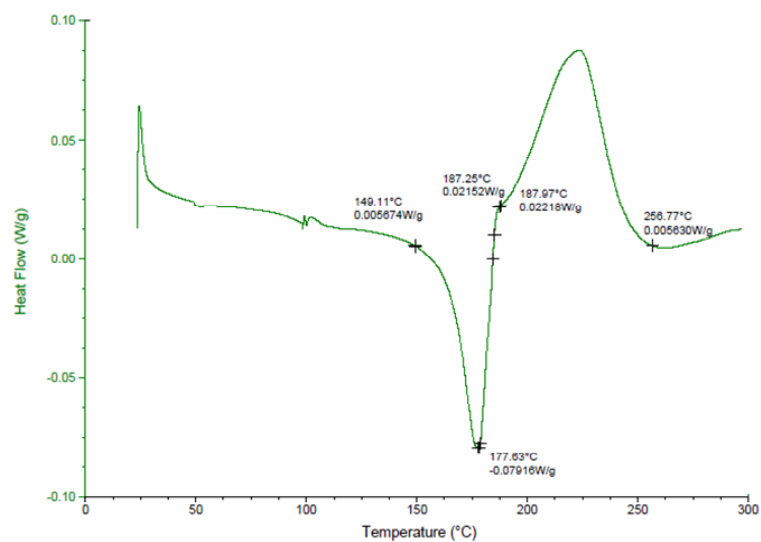

Polymorph 1

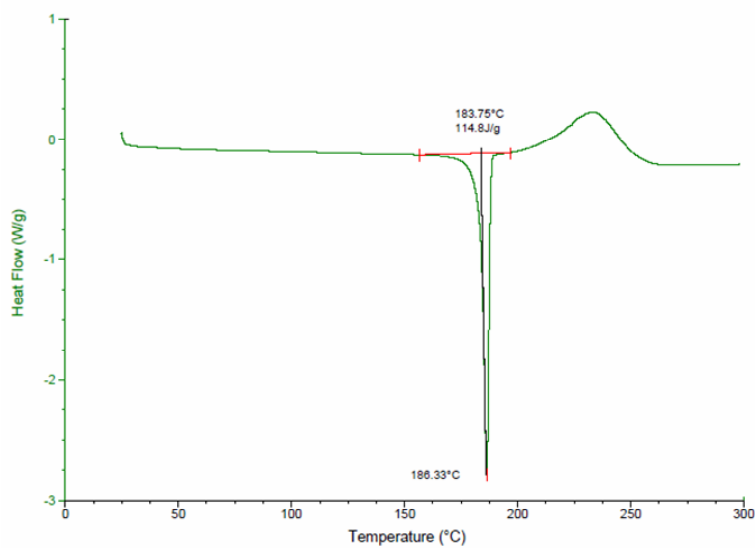

Polymorph 2

**Fig: Differential Scanning Calorimetry of the polymorphs 1 and 2**
